# Supplementary material for: Apolipoprotein E4 Polymorphism and Outcomes from Traumatic Brain Injury: A Living Systematic Review and Meta-Analysis
Source: PubMed Central journal article supplement — J Neurotrauma. 2021 Apr 5;38(8):1124–36. doi: 10.1089/neu.2018.6052 (PMC8054520; doi:10.1089/neu.2018.6052), 2021-04-05
Supplement: Supp_Data.pdf [file Supp_Data.pdf]

# Supplementary Material

## APPENDIX 1: BACKGROUND TO APOE

### *Apolipoprotein E*

The most extensively studied gene in the field of traumatic brain injury (TBI) is undoubtedly *APOE*. Its 34kDa protein has a central role in central nervous system lipid transport, including movement of cholesterol into cells to aid repair processes in damaged neurons. Three common alleles have been characterized ( $\epsilon 2$ , 3, and 4), which code for protein isoforms E2, E3 and E4. Of these it is the  $\epsilon 4$  allele that confers a confirmed dose-dependent increase in the risk of late onset Alzheimer's disease as well as intracerebral hemorrhage. The neurochemical mechanisms for APOE4's toxic effects have been reviewed extensively by Mahley and Huang. In brief, it is thought that the E4 isoform (which uniquely contains an arginine at residue 112) exhibits a property known as domain interaction, whereby an exposed arginine at residue 61 interacts with the C-terminal domain. This change in the tertiary structure of the peptide results in aberrant cleavage within the endoplasmic reticulum, and subsequent release of neurotoxic fragments into the cytosol, where they impair mitochondrial and cytoskeletal function. There is evidence that APOE4 inhibits neurite outgrowth (unlike E2/ E3 which encourage it) and that release of pro-inflammatory mediators (interleukin 6, nitric oxide) from stimulated microglia is greater in the presence of E4. In addition to direct neurotoxicity, APOE4 carriage may affect TBI outcomes through modulation of oxidant process or inflammation, alteration in cerebrovascular function or blood-brain

barrier integrity, as well as other mechanisms. The interested reader is referred to the publications listed below,<sup>1-6</sup> and the growing literature in this area.

### References

1. Main, B.S., Villapol, S., Sloley, S.S., Barton, D.J., Parsadonian, M., Agbaegbu, C., Stefos, K., McCann, M.S., Washington, P.M., Rodriguez, O.C., and Burns, M.P. (2018). Apolipoprotein E4 impairs spontaneous blood brain barrier repair following traumatic brain injury. *Mol. Neurodegener.* 13, 17.
2. Cao, J., Gaamouch, F.E., Meabon, J.S., Meeker, K.D., Zhu, L., Zhong, M.B., Bendik, J., Elder, G., Jing, P., Xia, J., Luo, W., Cook, D.G., and Cai, D. (2017). ApoE4-associated phospholipid dysregulation contributes to development of Tau hyper-phosphorylation after traumatic brain injury. *Sci. Rep.* 7, 11372.
3. Teng, Z., Guo, Z., Zhong, J., Cheng, C., Huang, Z., Wu, Y., Tang, S., Luo, C., Peng, X., Wu, H., Sun, X., and Jiang, L. (2017). ApoE influences the blood-brain barrier through the NF- $\kappa$ B/MMP-9 pathway after traumatic brain injury. *Sci. Rep.* 7, 6649.
4. Zlokovic, B.V. (2013). Cerebrovascular effects of apolipoprotein E: implications for Alzheimer disease. *JAMA Neurol.* 70, 440-444.
5. Mahley, R.W. and Huang, Y. (2012). Apolipoprotein e sets the stage: response to injury triggers neuropathology. *Neuron* 76, 871-885.
6. Ferguson, S., Mouzon, B., Kayihan, G., Wood, M., Poon, F., Doore, S., Mathura, V., Humphrey, J., O'Steen, B., Hayes, R., Roses, A., Mullan, M., and Crawford, F. (2010). Apolipoprotein E genotype and oxidative stress response to traumatic brain injury. *Neuroscience* 168, 811-819.

## APPENDIX 2: SEARCH STRATEGIES.

### **MEDLINE 1946 to present, via National Institute for Health and Care Excellence (NICE) Healthcare Database:**

(exp BRAIN INJURIES/ OR exp CRANIOCEREBRAL TRAUMA/ OR ((head\* OR brain\*) ADJ2 (injur\* OR trauma\*)),ti,ab) AND (exp GENETIC VARIATION/ OR exp GENOTYPE/ OR genetic\*.ti,ab OR mitochond\*.ti,ab OR exp INTRACELLULAR SIGNALING PEPTIDES AND PROTEINS/ OR genomic\* OR genome OR allele) AND (EXP NEUROPSYCHOLOGICAL TESTS/ OR "Glasgow outcome" OR GOS OR functional OR outcome OR discharge OR rehab\* OR recover\* OR GCS OR "Glasgow coma" OR Glasgow OR disability OR mortality OR ICU OR "intensive care" OR "critical care" OR rankin)

### **EMBASE 1980 to present, via NICE Healthcare Database:**

(exp BRAIN INJURIES/ OR exp CRANIOCEREBRAL TRAUMA/ OR ((head\* OR brain\*) ADJ2 (injur\* OR trauma\*)),ti,ab) AND (EXP GENOTYPE/ OR exp GENOTYPE ENVIRONMENT INTERACTION/ OR exp GENETIC POLYMORPHISM/ OR exp DNA POLYMORPHISM/ OR exp SINGLE NUCLEOTIDE POLYMORPHISM/ OR exp IN-

TRACELLULAR SIGNALING/ OR mitochond\*.ti,ab OR genetic\*.ti,ab OR genomic\* OR GENOME OR allele) AND (EXP NEUROPSYCHOLOGICAL BATTERY,LURIA NEBRASKA/ OR exp NEUROPSYCHOLOGICAL TEST/ OR exp NEUROPSYCHOLOGICAL TESTS/ OR exp NEUROPSYCHOLOGY/ OR rankin OR "Glasgow outcome" OR GOS OR functional OR outcome OR discharge OR rehab\* OR recover\* OR GCS OR "Glasgow coma" OR Glasgow OR disability OR mortality OR ICU OR "intensive care" OR "critical care")

### **CINAHL 1981 to Present, via NICE Healthcare Database:**

(exp HEAD INJURIES/ OR exp BRAIN INJURIES/ OR "traumatic brain injury".ti,ab OR ((head\* OR brain\*) ADJ2 (injur\* OR trauma\*)),ti,ab) AND (exp GENETICS/ OR exp POLYMORPHISM,GENETIC/ OR genetic\*.ti,ab OR mitochond\*.ti,ab OR genomic\* OR genome OR allele)

### **Google Scholar**

("brain injury" OR "head injury") AND (genetics OR allele OR polymorphism) AND (outcome OR "glasgow outcome")

SUPPLEMENTARY TABLE S1. STUDIES EXCLUDED FOLLOWING FULL TEXT REVIEW

| <i>Reason for exclusion</i>                                                              | <i>Study identifier</i>                                                                                                                                                                                                                                                                                                                                                                                                                                                                                                                                                                                            |
|------------------------------------------------------------------------------------------|--------------------------------------------------------------------------------------------------------------------------------------------------------------------------------------------------------------------------------------------------------------------------------------------------------------------------------------------------------------------------------------------------------------------------------------------------------------------------------------------------------------------------------------------------------------------------------------------------------------------|
| Conference abstract/letter with insufficient data or data subsequently published in full | Carter 2011, <sup>1</sup> Carter 2012, <sup>2</sup> <b>Garnett 2003</b> , <sup>3</sup> Jacobs 2009, <sup>4</sup> <b>Ponsford 2010</b> , <sup>5</sup> <b>Rubio Lopez 2010</b> , <sup>6</sup> Cousar 2009, <sup>7</sup> Adams 2014, <sup>8</sup> McDevitt 2014, <sup>9</sup> <b>Nogueras 2014</b> , <sup>10</sup> Sinha 2014, <sup>11</sup> Yue 2015, <sup>12</sup> <b>Sorbi 1995</b> <sup>13</sup> <b>Abrahams 2017</b> , <sup>14</sup> Ashman 2008 <sup>15</sup>                                                                                                                                                   |
| Outcome data not reported for each genotype/age group individually                       | Lankford 1994 <sup>16</sup>                                                                                                                                                                                                                                                                                                                                                                                                                                                                                                                                                                                        |
| No genotyping performed                                                                  | Romeiro 2007 <sup>17</sup>                                                                                                                                                                                                                                                                                                                                                                                                                                                                                                                                                                                         |
| No genetic variation identified within cohort                                            | <b>Collie 2004</b> , <sup>18</sup> <b>Harden 2004</b> <sup>19</sup>                                                                                                                                                                                                                                                                                                                                                                                                                                                                                                                                                |
| Comment letter in response to included study                                             | <b>Hayes 2017</b> , <sup>20</sup> <b>Hiekkanen 2007</b> , <sup>21</sup> <b>Horsburgh 2000</b> , <sup>22</sup> <b>Isoniemi 2006</b> , <sup>23</sup> <b>Jiang 2011</b> , <sup>24</sup> <b>Kerr 2003</b> , <sup>25</sup> <b>Koponen 2004</b> , <sup>26</sup> <b>Leclercq 2005</b> , <sup>27</sup> <b>Smith 2006</b> , <sup>28</sup> <b>Terrell 2008</b> , <sup>29</sup> <b>Tanriverdi 2008</b> , <sup>30</sup> <b>Tierney 2010</b> , <sup>31</sup> Neselius 2013, <sup>32</sup> <b>Xiao-Chuan 2011</b> , <sup>33</sup> <b>Nicoll 1995</b> <sup>34</sup> <b>Krupa 2003</b> , <sup>35</sup> Martinez 2009 <sup>36</sup> |
| Ineligible outcome measure                                                               |                                                                                                                                                                                                                                                                                                                                                                                                                                                                                                                                                                                                                    |
| Foreign language paper with original manuscript or English translation unavailable       |                                                                                                                                                                                                                                                                                                                                                                                                                                                                                                                                                                                                                    |
| Non-TBI study                                                                            | <b>Kutner 2000</b> , <sup>37</sup> <b>Lyons 2013</b> <sup>38</sup>                                                                                                                                                                                                                                                                                                                                                                                                                                                                                                                                                 |
| Full text not available                                                                  | <b>Jordan 1997</b> , <sup>39</sup> <b>Poovindran 2013</b> , <sup>40</sup> Willmott 2013 <sup>41</sup>                                                                                                                                                                                                                                                                                                                                                                                                                                                                                                              |

Bold = APOE studies.

## References for Supplementary Table S1

- Carter, M., Miller, M., Burkhardt, J., Scanlon, J., Ferrell, R., Conley, Y., and Wagner, A. (2011). Variants of SLC6A4 and BDNF in depression risk and onset following severe TBI. *J. Neurotrauma* 28.
- Carter, M., Niyonkuru, C., Scanlon, J., Deslouches, S., Ferrell, R., Conley, Y., and Wagner, A. (2012). Interactions with bdnf gene variation and age in mortality following severe TBI. *J. Neurotrauma* 29.
- Garnett, M.R., Blamire, A.M., Corkill, R.G., Cadoux-Hudson, T.A., Rajagopalan, B., and Styles, P. 2003. Apolipoprotein E isoforms correlate with NAA to Creatine ratio in patients following traumatic brain injury: a proton magnetic resonance spectroscopy study. Presented at the International Society for Magnetic Resonance in Medicine Annual Meeting, Toronto Ontario.
- Jacobs, B., Little, S., Franke, B., Bein, G., Chakraborty, T., and Vos, P. (2009). Immunological and plasminogen-activator-inhibitor-1 genotypes and outcome after traumatic brain injury. *J. Neurotrauma* 26.
- Ponsford, J., McLaren, A., Rudzki, D., Schoenberger, M., Olver, J., and Ponsford, M. (2010). The relationship between ApoE genetic status and outcome after traumatic brain injury. *Brain Inj.* 24.
- Rubio López, M.I., San, A.H., Garcia, A., Gonzalez, C., Fernandez, B., Gomez, V., and Iglesias, D. (2010) Apolipoprotein e as a prognostic marker of brain damage. *Intensive Care Med.* 36.
- Cousar, J.L., Conley, Y.P., Sarnaik, A.A., Kochanek, P.M., Okonkwo, D.O., and Clark, R.S.B. (2009). Mitochondrial uncoupling protein-4 polymorphisms are associated with depth of coma after traumatic brain injury. *J. Cereb. Blood Flow Metab.* 29, S32–S33.
- Adams, S., Conley, Y., Okonkwo, D., Puccio, A., Clark, R., Dixon, E., Kochanek, P., and Empey, P. (2014). ABCG2 RS2231142 C.421C>A is associated with outcomes following severe traumatic brain injury. *Crit. Care Med.* 42.
- McDevitt, J., Tierney, R., Torg, J., and Krynetskiy, E. (2014). Genetic association for prolonged recovery from athletic concussion: a novel study. *Brain Inj.* 28.
- Nogueras, A.M., Balmaseda, R., O 'Valle, M., Villalba, A., Crespo, G.M., Navarro, M.D., Garcia-Blazquez, C., Amoros, D., Noe, E., and Ferri, J. (2014). Influence of APOE genotype and APOE promoters A-491T and G-219T in the rehabilitation of patients with TBI after emergence from post-traumatic amnesia. *Brain Inj.* 28.
- Sinha, S., Mansoori, N., Samson, N., Mukhopadhyay, A.K., and Sharma, B.S. (2014). Effect of IL-6-174 G/C polymorphism in predicting disability and functional outcome in patients with severe traumatic brain injury (STBI). *Brain Inj.* 28.
- Yue, J.K., Pronger, A.M., Ferguson, A.R., Temkin, N.R., Sharma, S., Rosand, J., Sorani, M.D., McAllister, T.W., Barber, J., Winkler, E.A., Burchard, E.G., Hu, D., Lingsma, H.F., Cooper, S.R., Puccio, A.M., Okonkwo, D.O., Diaz-Arrastia, R., and Manley, G.T. (2015). Association of a common genetic variant within ANKK1 with six-month cognitive performance after traumatic brain injury. *Neurogenetics* 16, 169–180.
- Sorbi, S., Nacmias, B., Piacentini, S., Repice, A., Latorraca, S., Forleo, P., and Amaducci, L. (1995). ApoE as a prognostic factor for post-traumatic coma. *Nat. Med.* 1, 852.
- Abrahams, S., Mc Fie, S., Patricios, J., Suter, J., Posthumus, M., and September, A.V. (2017). An association between polymorphisms within the APOE gene and concussion aetiology in rugby union players. *J. Sci. Med. Sport* 21, 117–122.
- Ashman, T.A., Cantor, J.B., Gordon, W.A., Sacks, A., Spielman, L., Egan, M., and Hibbard, M.R. (2008). A comparison of cognitive functioning in older adults with and without traumatic brain injury. *J. Head Trauma Rehabil.* 23, 139–148.
- Lankford, D.A., Wellman, J.J., and O 'Hara, C. (1994). Posttraumatic narcolepsy in mild to moderate closed head injury. *Sleep* 17.
- Romeiro, R.R., Romano-Silva, M.A., De Marco, L., Teixeira, A.L., and Correa, H. (2007). Can variation in aquaporin 4 gene be associated with different outcomes in traumatic brain edema? *Neurosci. Lett.* 426, 133–134.
- Collie, A., Maruff, P., and Falletti, M. (2004). APOE influences on neuropsychological function after mild head injury: within-person comparisons. *Neurology* 63, 2460.
- Harden, C.L. (2004). The apolipoprotein E epsilon (epsilon) 4 allele is important for trauma-related epilepsy. *Epilepsy Curr.* 4, 29–30.
- Hayes, J.P., Logue, M.W., Sadeh, N., Spielberg, J.M., Verfaellie, M., Hayes, S.M., Reagan, A., Salat, D.H., Wolf, E.J., McGlinchey, R.E., Milberg, W.P., Stone, A., Schichang, S.A., and Miller, M.W. (2017). Mild traumatic brain injury is associated with reduced cortical thickness in those at risk for Alzheimer 's disease. *Brain* 140, 813–825.
- Hiekkanen, H., Kurki, T., Brandstack, N., Kairisto, V., and Tenovuo, O. (2007). MRI changes and ApoE genotype, a prospective 1-year follow-up of traumatic brain injury: a pilot study. *Brain Inj.* 21, 1307–1314.
- Horsburgh, K., Cole, G.M., Yang, F., Savage, M.J., Greenberg, B.D., Gentleman, S.M., Graham, D.I., and Nicoll, J.A.R. (2000). beta-amyloid (Abeta)42(43), Abeta42, Abeta40 and apoE immunostaining of plaques in fatal head injury. *Neuropathol. Appl. Neurobiol.* 26, 124–132.
- Isoniemi, H., Tenovuo, O., Portin, R., Kurki, T., and Kairisto, V. (2006). Hippocampal volume, brain atrophy, and APOE genotype after traumatic brain injury. *Neurology* 67, 756–760.
- Jiang, L., Yin, X., Yin, C., Zhou, S., Dan, W., and Sun, X. (2011). Different quantitative EEG alterations induced by TBI among patients with different APOE genotypes. *Neurosci. Lett.* 505, 160–164.
- Kay, A.D., Petzold, A., Keir, G., Thompson, E.J., Kerr, M., and Nicoll, J.A.R. (2003). Cerebrospinal fluid apolipoprotein E concentration decreases after traumatic brain injury. *J. Neurotrauma* 20, 243–250.

26. Koponen, S., Taiminen, T., Kairisto, V., Portin, R., Isoniemi, H., Hinkka, S., and Tenovu, O. (2004). APOE-epsilon4 predicts dementia but not other psychiatric disorders after traumatic brain injury. *Neurology* 63, 749–750.
27. Leclercq, P.D., Murray, L.S., Smith, C., Graham, D.I., Nicoll, J.A.R., and Gentleman, S.M. (2005). Cerebral amyloid angiopathy in traumatic brain injury: association with apolipoprotein E genotype. *J. Neurol. Neurosurg. Psychiatry* 76, 229–233.
28. Smith, C., Graham, D.I., Murray, L.S., Stewart, J., and Nicoll, J.A.R. (2006). Association of APOE e4 and cerebrovascular pathology in traumatic brain injury. *J. Neurol. Neurosurg. Psychiatry* 77, 363–366.
29. Terrell, T.R., Bostick, R.M., Abramson, R., Xie, D., Barfield, W., Cantu, R., Stanek, M., and Ewing, T. (2008). APOE, APOE promoter, and Tau genotypes and risk for concussion in college athletes. *Clin. J. Sport Med.* 18, 10–17.
30. Tanriverdi, F., Taheri, S., Ulutabanca, H., Caglayan, A.O., Ozkul, Y., Dundar, M., Selcuklu, A., Unluhizarci, K., Casanueva, F.F., and Kelestimur, F. (2008). Apolipoprotein E3/E3 genotype decreases the risk of pituitary dysfunction after traumatic brain injury due to various causes: preliminary data. *J. Neurotrauma* 25, 1071–1077.
31. Tierney, R.T., Mansell, J.L., Higgins, M., McDevitt, J.K., Toone, N., Gaughan, J.P., Mishra, A., and Krynetskiy, E. (2010). Apolipoprotein E genotype and concussion in college athletes. *Clin. J. Sport Med.* 20, 464–468.
32. Neselius, S., Brisby, H., Zetterberg, H., Blennow, K., and Marcusson, J. (2013). Increased CSF levels of phosphorylated neurofilament heavy protein following bout in amateur boxers. *PLoS One* 8.
33. Xiao-Chuan, S., Li, J., Xiao-Hong, Y., Cheng, Y., We, D., and Ke, L. (2011). The influence of apolipoprotein E polymorphisms on the electrical activity of the brain after mild-to-moderate traumatic brain injury. *J. Neurotrauma* 28.
34. Nicoll, J.A., Roberts, G.W., and Graham, D.I. (1995). Apolipoprotein E epsilon 4 allele is associated with deposition of amyloid beta-protein following head injury. *Nat. Med.* 1, 135–137.
35. Krupa, M., Moskała, M., Gościński, I., Traczewski, W., Polak, J., and Sado, M. (2003). [Association of apoE polymorphism and treatment outcome in patients with traumatic brain injury]. *Neurol. Neurochir. Polska* 37, 1223–1229.
36. Martínez Lucas, P., Carbayo Herencia, J.A., Moreno Cuesta, J., Jordán, J., García Cuesta, D.C., and Escribano Martínez, J. (2009). [Evaluation of the p53 Arg72Pro polymorphism as a prognostic factor in severe head injury and the inclusion of this indicator in a predictive model]. *Rev. Esp. Anesthesiol. Reanim.* 56, 529–535.
37. Kutner, K.C., Tsai, J., Jordan, B., Relkin, N.R., and Erlanger, D.M. (2000). Lower cognitive performance of older football players possessing apolipoprotein E e4. *Neurosurgery* 47, 651–658.
38. Lyons, M.J., Genderson, M., Grant, M.D., Logue, M., Zink, T., McKenzie, R., Franz, C.E., Panizzon, M., Lohr, J.B., Jerskey, B., and Kremen, W.S. (2013). Gene-environment interaction of ApoE genotype and combat exposure on PTSD. *Am. J. Med. Genet. B Neuropsychiatr. Genet.* 162B, 762–769.
39. Jordan, B.D., Relkin, N.R., Ravdin, L.D., Jacobs, A.R., Bennett, A., and Gandy, S. (1997). Apolipoprotein E epsilon4 associated with chronic traumatic brain injury in boxing. *JAMA* 278, 136–140.
40. Poovindran, A.R., Ganesan, D., and Wong, K.T. (2013). Polymorphism in the APOE gene and promoter in the functional outcome of traumatic brain injury in the Malaysian population. *J. Health \ Transl. Med.* 16, 89.
41. Willmott, C., Ponsford, J., McAllister, T.W., and Burke, R. (2013). Effect of COMT Val158Met genotype on attention and response to methylphenidate following traumatic brain injury. *Brain Inj.* 27, 1281–1286.

SUPPLEMENTARY TABLE S2. RISK OF BIAS OF REVIEWED STUDIES

| <i>Study ID</i>       | <i>Study participation</i> | <i>Study attrition</i> | <i>Prognostic factor Mx</i> | <i>Outcome Mx</i> | <i>Confounding</i> | <i>Statistical Ax and reporting</i> |
|-----------------------|----------------------------|------------------------|-----------------------------|-------------------|--------------------|-------------------------------------|
| Alexander 2007        | Moderate                   | Moderate               | Moderate                    | Low               | Low                | Low                                 |
| Chiang 2003           | Low                        | Low                    | Moderate                    | Low               | Moderate           | Low                                 |
| Diaz-Arrastia 2003    | Low                        | High                   | High                        | Low               | Moderate           | Low                                 |
| Friedman 1999         | Moderate                   | Moderate               | Moderate                    | Low               | High               | Moderate                            |
| Hiekkänen 2009        | Low                        | Low                    | Low                         | Moderate          | Moderate           | High                                |
| Millar 2003           | Moderate                   | High                   | Moderate                    | Low               | Moderate           | Low                                 |
| Nathoo 2003           | Moderate                   | Moderate               | Low                         | Low               | Moderate           | Moderate                            |
| Olivecrona 2010       | Low                        | Moderate               | Low                         | Low               | Moderate           | Moderate                            |
| Ponsford 2011         | Moderate                   | Moderate               | Low                         | Moderate          | Moderate           | Moderate                            |
| Pruthi 2010           | Moderate                   | High                   | High                        | Low               | High               | Moderate                            |
| Teasdale 2005         | Moderate                   | Low                    | Moderate                    | Low               | Moderate           | Low                                 |
| Teasdale 1997         | Moderate                   | Moderate               | Moderate                    | Low               | Low                | Moderate                            |
| Willemse-van Son 2008 | Moderate                   | Low                    | Moderate                    | Low               | Moderate           | Low                                 |
| Yousuf 2015           | Moderate                   | Low                    | Moderate                    | Moderate          | Moderate           | Moderate                            |
| Anderson 2009         | Moderate                   | Moderate               | Moderate                    | Moderate          | Moderate           | Moderate                            |
| Ariza 2006            | Moderate                   | High                   | Moderate                    | Low               | Low                | Low                                 |
| Banks 2015            | High                       | Low                    | Moderate                    | Moderate          | High               | High                                |
| Chamelian 2004        | Moderate                   | Low                    | Low                         | Moderate          | Moderate           | Low                                 |
| Crawford 2002         | Moderate                   | Low                    | Moderate                    | Moderate          | Moderate           | Low                                 |
| Eramudugolla 2014     | Low                        | Moderate               | Low                         | Moderate          | High               | Low                                 |
| Han 2007              | Moderate                   | Moderate               | Moderate                    | Low               | Moderate           | Low                                 |
| Han 2009              | Moderate                   | Low                    | Moderate                    | Moderate          | High               | Low                                 |
| Isoniemi 2006         | Moderate                   | High                   | Moderate                    | Low               | High               | Low                                 |
| Jiang 2006            | Moderate                   | Low                    | Moderate                    | Moderate          | Moderate           | Low                                 |
| Kristman 2008         | Moderate                   | High                   | Moderate                    | Low               | Low                | Low                                 |
| Lee 2017              | Low                        | High                   | Low                         | Low               | High               | Moderate                            |
| Liberman 2002         | Low                        | High                   | Moderate                    | Low               | Low                | Low                                 |
| Lichtman 2000         | Moderate                   | High                   | Moderate                    | Moderate          | Moderate           | Low                                 |
| Mejia 2016            | High                       | Moderate               | Moderate                    | Low               | Moderate           | Moderate                            |
| Merritt               | Low                        | Moderate               | Low                         | Low               | High               | Low                                 |
| Miller 2010           | Low                        | Moderate               | Moderate                    | Low               | Moderate           | Moderate                            |
| Müller 2009           | Moderate                   | High                   | Moderate                    | Low               | Moderate           | Moderate                            |
| Nielson 2017          | Low                        | Low                    | Low                         | Low               | Moderate           | Low                                 |
| Noé 2010              | Low                        | High                   | High                        | Low               | Moderate           | Moderate                            |
| Olivecrona 2012       | High                       | Moderate               | Moderate                    | Moderate          | Moderate           | Moderate                            |
| Olivecrona 2017       | Moderate                   | Low                    | Moderate                    | Low               | Moderate           | Moderate                            |
| Ost 2008              | Low                        | Low                    | Moderate                    | Low               | High               | High                                |
| Padgett 2016          | Low                        | Moderate               | Low                         | Low               | Moderate           | Low                                 |
| Rapoport 2008         | Low                        | Moderate               | Moderate                    | Moderate          | Moderate           | Moderate                            |
| Røe 2016              | High                       | High                   | Moderate                    | Low               | Moderate           | High                                |
| Shadli 2011           | Moderate                   | Low                    | Moderate                    | Low               | Moderate           | Low                                 |
| Sundström 2004        | Low                        | Low                    | Moderate                    | Moderate          | Moderate           | Low                                 |
| Sundström 2007 (1)    | Low                        | Low                    | Moderate                    | High              | High               | Low                                 |
| Sundström 2007 (2)    | High                       | Low                    | Moderate                    | Moderate          | Moderate           | Moderate                            |
| Teasdale TW 2000      | High                       | Low                    | Moderate                    | High              | Moderate           | Moderate                            |
| Yue 2017              | Low                        | Low                    | Low                         | Moderate          | Moderate           | Low                                 |
| Jiang 2007            | Moderate                   | Low                    | Moderate                    | Moderate          | Moderate           | Low                                 |
| Lendon 2003           | High                       | High                   | Low                         | Moderate          | Moderate           | Low                                 |

Ax, analysis; Mx, measurement.

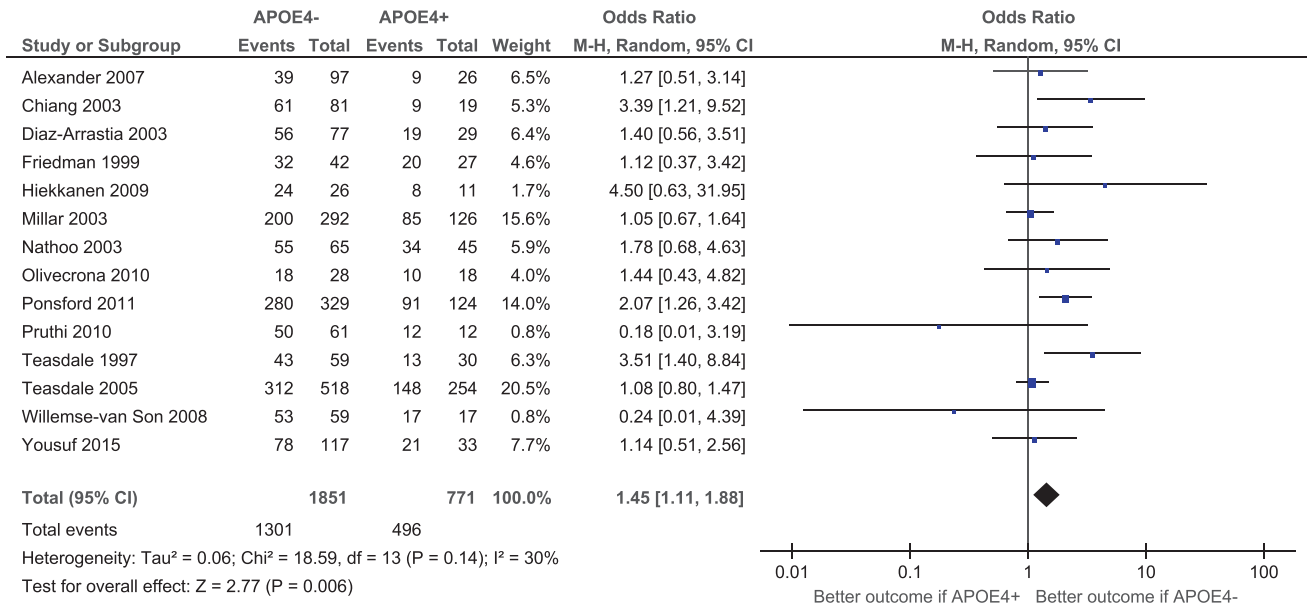

**SUPPLEMENTARY FIG. S1.** Sensitivity analysis 1 - Global Outcome (last recorded score, all studies).

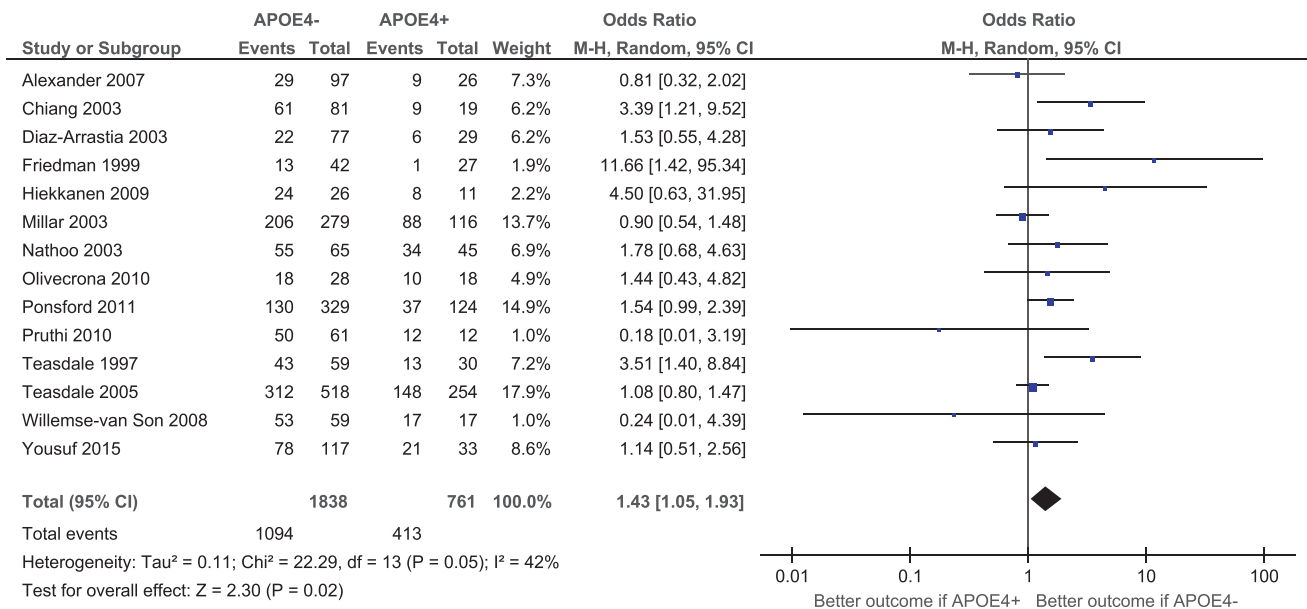

**SUPPLEMENTARY FIG. S2.** Sensitivity analysis 2—Global Outcome (6 months or closest, GOS 4-5/GOS-E 7-8, all studies). GOS, Glasgow Outcome Score.

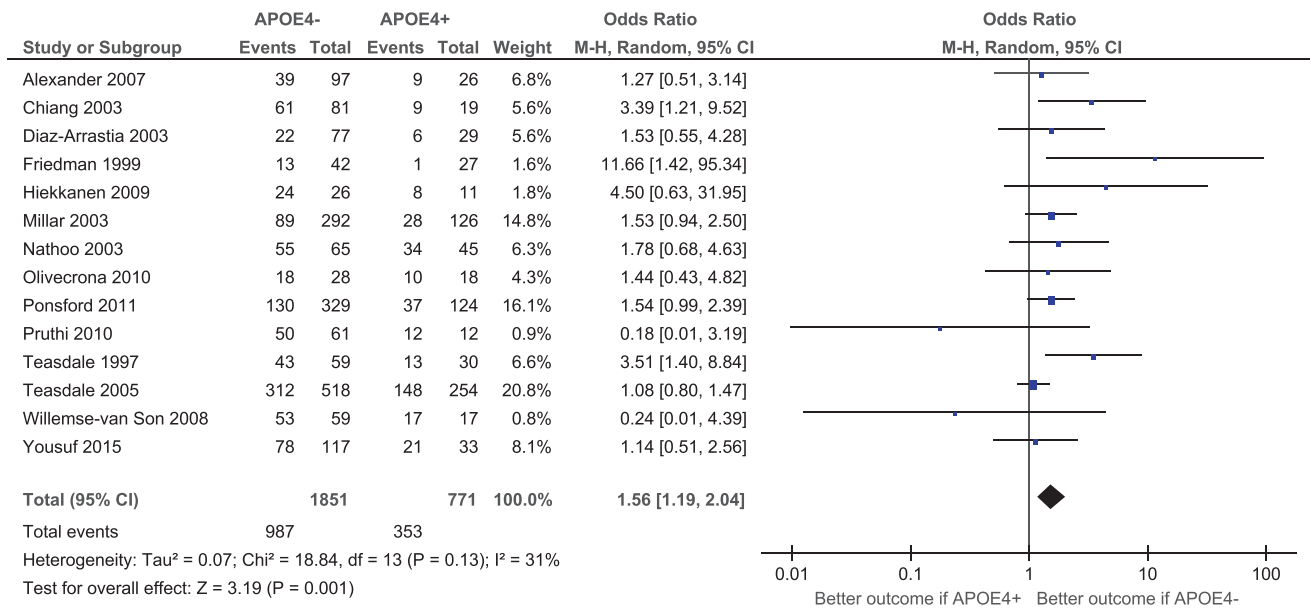

**SUPPLEMENTARY FIG. S3.** Sensitivity analysis 3—Global Outcome (last recorded score, GOS 4-5/GOS-E 7-8, all studies). GOS, Glasgow Outcome Score.

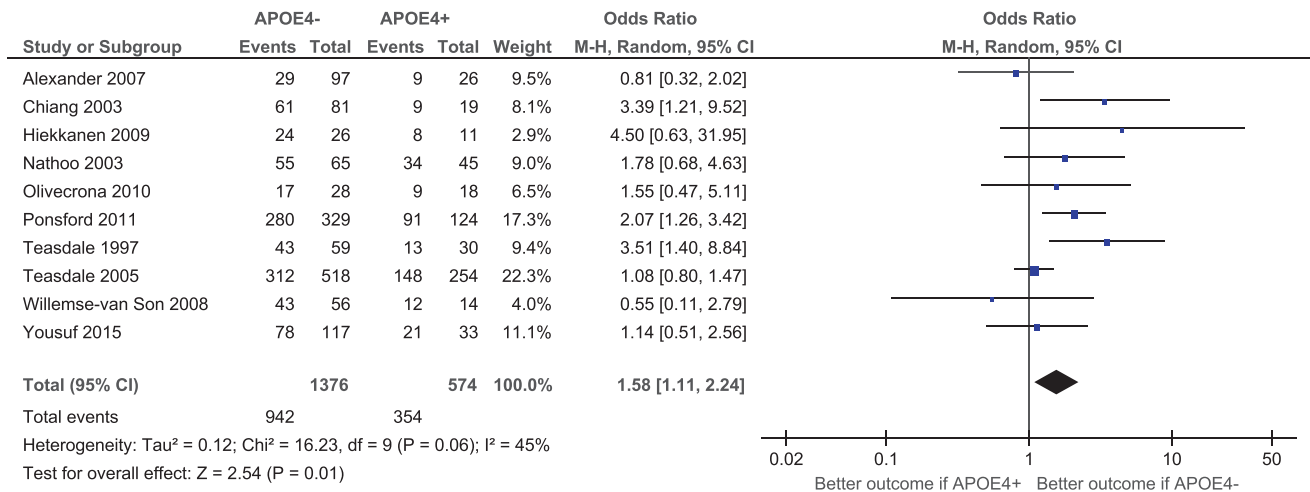

**SUPPLEMENTARY FIG. S4.** Sensitivity analysis 4—Global outcome (6-month data or closest, omitting high risk of bias studies).

SUPPLEMENTARY TABLE S3. GRADING OF RECOMMENDATIONS ASSESSMENT, DEVELOPMENT AND EVALUATION (GRADE)  
EVALUATION OF APOE STUDIES WITH REGARD TO GLOBAL OUTCOMES

| <i>Prog factor</i> | <i>n</i> | <i>Studies (n)</i> | <i>Cohorts (n)</i> | <i>Effect size (CI)</i> | <i>Phase</i> | <i>SL</i> | <i>Inc</i> | <i>Ind</i> | <i>Imp</i> | <i>Pub bias</i> | <i>Effect size</i> | <i>Dose effect</i> | <i>Overall quality</i> |
|--------------------|----------|--------------------|--------------------|-------------------------|--------------|-----------|------------|------------|------------|-----------------|--------------------|--------------------|------------------------|
| APOE               | 2593     | 14                 | 14                 | OR 1.39<br>(1.05–1.84)  | 2            | X         | ✓          | ✓          | ✓          | ✓               | –                  | –                  | Low                    |

Publication bias assessed by Funnel Plot.

✓=no serious limitations.

X=serious limitations.

–=not present.

Prog, prognostic; CI, confidence interval; SL, study limitations; Inc, inconsistency; Ind, indirectness; Imp, imprecision; OR, odds ratio.

SUPPLEMENTARY TABLE S4. RESULTS OF STUDIES' EFFECT OF APOE ON OTHER OUTCOMES

| Author                          | Treatment/Comparator                                                                                                                                                                                                                                                                                                                                                                                                                                                                                                                                                    | OC                      | 6 mo                                                                                                                                                                                                                                                            | 12 mo                                                              | Comment                                                                                                                                                                                                                                                                                                                                                                                                                                   |                                                                                                                                                                                                                                                                                                                                                                                                                                                                                                                                                                                                                                       |
|---------------------------------|-------------------------------------------------------------------------------------------------------------------------------------------------------------------------------------------------------------------------------------------------------------------------------------------------------------------------------------------------------------------------------------------------------------------------------------------------------------------------------------------------------------------------------------------------------------------------|-------------------------|-----------------------------------------------------------------------------------------------------------------------------------------------------------------------------------------------------------------------------------------------------------------|--------------------------------------------------------------------|-------------------------------------------------------------------------------------------------------------------------------------------------------------------------------------------------------------------------------------------------------------------------------------------------------------------------------------------------------------------------------------------------------------------------------------------|---------------------------------------------------------------------------------------------------------------------------------------------------------------------------------------------------------------------------------------------------------------------------------------------------------------------------------------------------------------------------------------------------------------------------------------------------------------------------------------------------------------------------------------------------------------------------------------------------------------------------------------|
| Anderson 2009                   | APOE4- (n = 36)                                                                                                                                                                                                                                                                                                                                                                                                                                                                                                                                                         | SRT, Sum of Recall      | M<br>81                                                                                                                                                                                                                                                         | M<br>83                                                            | No SD's given in tables; scores reported are M SRCL scores following adjustment for seizure occurrence, TBI severity, education and genotype. APOE4- perform better at both testing points:<br>p=0.027 at 6 months<br>p=0.012 at 12 months<br>No comparisons significant prior to above adjustments.                                                                                                                                      |                                                                                                                                                                                                                                                                                                                                                                                                                                                                                                                                                                                                                                       |
|                                 | APOE4+ (n = 15)                                                                                                                                                                                                                                                                                                                                                                                                                                                                                                                                                         | SRT, Sum of Recall      | 71                                                                                                                                                                                                                                                              | 71                                                                 |                                                                                                                                                                                                                                                                                                                                                                                                                                           |                                                                                                                                                                                                                                                                                                                                                                                                                                                                                                                                                                                                                                       |
| Crawford 2002                   | APOE4- (n = 80)                                                                                                                                                                                                                                                                                                                                                                                                                                                                                                                                                         | Learning slope          | 0.91                                                                                                                                                                                                                                                            | 0.63                                                               | Table shows memory test domains of California Verbal Learning Test - all four results significant for APOE4+ performing worse than APOE4- Learning slope p=0.036<br>Trial 5 p=0.033<br>Short-Delay Free Recall p=0.019<br>Long-Delay Free Recall p=0.022                                                                                                                                                                                  |                                                                                                                                                                                                                                                                                                                                                                                                                                                                                                                                                                                                                                       |
|                                 |                                                                                                                                                                                                                                                                                                                                                                                                                                                                                                                                                                         | Trial 5                 | 8.91                                                                                                                                                                                                                                                            | 3.64                                                               |                                                                                                                                                                                                                                                                                                                                                                                                                                           |                                                                                                                                                                                                                                                                                                                                                                                                                                                                                                                                                                                                                                       |
|                                 |                                                                                                                                                                                                                                                                                                                                                                                                                                                                                                                                                                         | Short-Delay Free Recall | 6.63                                                                                                                                                                                                                                                            | 4.2                                                                |                                                                                                                                                                                                                                                                                                                                                                                                                                           |                                                                                                                                                                                                                                                                                                                                                                                                                                                                                                                                                                                                                                       |
|                                 | APOE4+ (n = 30)                                                                                                                                                                                                                                                                                                                                                                                                                                                                                                                                                         | Learning slope          | 0.62                                                                                                                                                                                                                                                            | 0.63                                                               |                                                                                                                                                                                                                                                                                                                                                                                                                                           |                                                                                                                                                                                                                                                                                                                                                                                                                                                                                                                                                                                                                                       |
|                                 |                                                                                                                                                                                                                                                                                                                                                                                                                                                                                                                                                                         | Trial 5                 | 7.23                                                                                                                                                                                                                                                            | 3.42                                                               |                                                                                                                                                                                                                                                                                                                                                                                                                                           |                                                                                                                                                                                                                                                                                                                                                                                                                                                                                                                                                                                                                                       |
|                                 |                                                                                                                                                                                                                                                                                                                                                                                                                                                                                                                                                                         | Short-Delay Free Recall | 4.5                                                                                                                                                                                                                                                             | 4.07                                                               |                                                                                                                                                                                                                                                                                                                                                                                                                                           |                                                                                                                                                                                                                                                                                                                                                                                                                                                                                                                                                                                                                                       |
|                                 | Long-Delay Free Recall                                                                                                                                                                                                                                                                                                                                                                                                                                                                                                                                                  | 4.63                    | 4.54                                                                                                                                                                                                                                                            |                                                                    |                                                                                                                                                                                                                                                                                                                                                                                                                                           |                                                                                                                                                                                                                                                                                                                                                                                                                                                                                                                                                                                                                                       |
| Han 2007                        | APOE4- (n = 62)                                                                                                                                                                                                                                                                                                                                                                                                                                                                                                                                                         | CVLT List A             | 4-5 weeks post TBI                                                                                                                                                                                                                                              |                                                                    | APOE4+ perform better, p=0.008. As a secondary outcome, groups reanalysed with adjustment for differing proportions of mild/moderate TBI - following this 2 measures of D-KEFS and one on WAIS become "near significant" for better performance in APOE4+ (p=0.2-0.8) and CVLT measure becomes less significant (p=0.04). Severity balanced subgroups created by random selection of participants and re-analysis of new balanced groups. |                                                                                                                                                                                                                                                                                                                                                                                                                                                                                                                                                                                                                                       |
|                                 |                                                                                                                                                                                                                                                                                                                                                                                                                                                                                                                                                                         |                         | M                                                                                                                                                                                                                                                               | SD                                                                 |                                                                                                                                                                                                                                                                                                                                                                                                                                           |                                                                                                                                                                                                                                                                                                                                                                                                                                                                                                                                                                                                                                       |
|                                 | 38.75                                                                                                                                                                                                                                                                                                                                                                                                                                                                                                                                                                   | 9.46                    |                                                                                                                                                                                                                                                                 |                                                                    |                                                                                                                                                                                                                                                                                                                                                                                                                                           |                                                                                                                                                                                                                                                                                                                                                                                                                                                                                                                                                                                                                                       |
|                                 | APOE4+ (n = 16)                                                                                                                                                                                                                                                                                                                                                                                                                                                                                                                                                         | CVLT List A             | 46.19                                                                                                                                                                                                                                                           | 10.85                                                              |                                                                                                                                                                                                                                                                                                                                                                                                                                           |                                                                                                                                                                                                                                                                                                                                                                                                                                                                                                                                                                                                                                       |
| Han 2009                        | <p>Comments</p> <p>Authors present a hierarchical tree model from ODA for predicting job status change following TBI:<br/>APOE4+: greater immediate vs delayed memory differences (CVLT-II change in long delay as a % of short delay free recall) predicts no job change p=0.005594; 6/7 correctly classified as no job change, 8/9 correctly classified as job change.<br/>APOE4-: job change is predicted by recognition memory (CVLT-II) if &gt;18.5 on Kennedy-Johnson Postconcussive Symptom Scales, but by (WASI) IQ score if fewer postconcussive symptoms.</p> |                         |                                                                                                                                                                                                                                                                 |                                                                    |                                                                                                                                                                                                                                                                                                                                                                                                                                           |                                                                                                                                                                                                                                                                                                                                                                                                                                                                                                                                                                                                                                       |
| Isoniemi 2006                   | Treatment/Comparator                                                                                                                                                                                                                                                                                                                                                                                                                                                                                                                                                    | OC                      | Baseline                                                                                                                                                                                                                                                        |                                                                    | Comment                                                                                                                                                                                                                                                                                                                                                                                                                                   |                                                                                                                                                                                                                                                                                                                                                                                                                                                                                                                                                                                                                                       |
|                                 |                                                                                                                                                                                                                                                                                                                                                                                                                                                                                                                                                                         |                         | M                                                                                                                                                                                                                                                               | SD                                                                 |                                                                                                                                                                                                                                                                                                                                                                                                                                           |                                                                                                                                                                                                                                                                                                                                                                                                                                                                                                                                                                                                                                       |
|                                 |                                                                                                                                                                                                                                                                                                                                                                                                                                                                                                                                                                         |                         | M                                                                                                                                                                                                                                                               | SD                                                                 |                                                                                                                                                                                                                                                                                                                                                                                                                                           |                                                                                                                                                                                                                                                                                                                                                                                                                                                                                                                                                                                                                                       |
|                                 |                                                                                                                                                                                                                                                                                                                                                                                                                                                                                                                                                                         |                         | M                                                                                                                                                                                                                                                               | SD                                                                 |                                                                                                                                                                                                                                                                                                                                                                                                                                           |                                                                                                                                                                                                                                                                                                                                                                                                                                                                                                                                                                                                                                       |
| APOE2+ (n = 10)                 | MDB score                                                                                                                                                                                                                                                                                                                                                                                                                                                                                                                                                               | 3.9                     | 3.7                                                                                                                                                                                                                                                             | 3.7                                                                | 5.38                                                                                                                                                                                                                                                                                                                                                                                                                                      | MDB = mild deterioration battery. Eight tests from other scales (e.g. WASI), with 'deterioration points' awarded depending on how far below norm of age/education controlled group a subject is. 1 point = 1.5 SD below norm, 2 points = 2 SD below norm, 3 points = 3 SD below norm. Maximum score = 24 points, the higher a subject's score, the further below the norm that individual is performing.<br>p=0.034 for worse performance in APOE4+ vs others by ANOVA at follow-up (i.e. higher scores at follow-up; stands up to Bonferroni correction). No statistically significant difference in baseline scores between groups. |
| APOE3/3 (n = 32)                | MDB score                                                                                                                                                                                                                                                                                                                                                                                                                                                                                                                                                               | 2.5                     | 3.96                                                                                                                                                                                                                                                            | 3.5                                                                | 5.09                                                                                                                                                                                                                                                                                                                                                                                                                                      |                                                                                                                                                                                                                                                                                                                                                                                                                                                                                                                                                                                                                                       |
| APOE4+ (n = 19)                 | MDB score                                                                                                                                                                                                                                                                                                                                                                                                                                                                                                                                                               | 4.4                     | 3.92                                                                                                                                                                                                                                                            | 7.4                                                                | 5.23                                                                                                                                                                                                                                                                                                                                                                                                                                      |                                                                                                                                                                                                                                                                                                                                                                                                                                                                                                                                                                                                                                       |
|                                 |                                                                                                                                                                                                                                                                                                                                                                                                                                                                                                                                                                         |                         |                                                                                                                                                                                                                                                                 |                                                                    |                                                                                                                                                                                                                                                                                                                                                                                                                                           |                                                                                                                                                                                                                                                                                                                                                                                                                                                                                                                                                                                                                                       |
| Jiang 2006                      | Treatment/Comparator                                                                                                                                                                                                                                                                                                                                                                                                                                                                                                                                                    | APOE4+                  | APOE4-                                                                                                                                                                                                                                                          | Comments                                                           |                                                                                                                                                                                                                                                                                                                                                                                                                                           |                                                                                                                                                                                                                                                                                                                                                                                                                                                                                                                                                                                                                                       |
|                                 |                                                                                                                                                                                                                                                                                                                                                                                                                                                                                                                                                                         |                         |                                                                                                                                                                                                                                                                 | %                                                                  | %                                                                                                                                                                                                                                                                                                                                                                                                                                         |                                                                                                                                                                                                                                                                                                                                                                                                                                                                                                                                                                                                                                       |
|                                 |                                                                                                                                                                                                                                                                                                                                                                                                                                                                                                                                                                         |                         |                                                                                                                                                                                                                                                                 | 36.8                                                               | 63.2                                                                                                                                                                                                                                                                                                                                                                                                                                      |                                                                                                                                                                                                                                                                                                                                                                                                                                                                                                                                                                                                                                       |
| Clinical deterioration (n = 19) | 11                                                                                                                                                                                                                                                                                                                                                                                                                                                                                                                                                                      | 89                      | Following adjustment for age, sex, smoking, alcohol, mechanism, GCS, CT findings, APOE4 carriers found to be statistically significantly over-represented in clinical deterioration group: OR for deterioration (APOE4+ vs APOE4-) 4.725 (1.511-14.780) p=0.008 |                                                                    |                                                                                                                                                                                                                                                                                                                                                                                                                                           |                                                                                                                                                                                                                                                                                                                                                                                                                                                                                                                                                                                                                                       |
| Clinical stabilisation (n = 91) |                                                                                                                                                                                                                                                                                                                                                                                                                                                                                                                                                                         |                         |                                                                                                                                                                                                                                                                 |                                                                    |                                                                                                                                                                                                                                                                                                                                                                                                                                           |                                                                                                                                                                                                                                                                                                                                                                                                                                                                                                                                                                                                                                       |
| Kristman 2008                   | Treatment/Comparator                                                                                                                                                                                                                                                                                                                                                                                                                                                                                                                                                    | OC                      | 4 years                                                                                                                                                                                                                                                         |                                                                    | Comments                                                                                                                                                                                                                                                                                                                                                                                                                                  |                                                                                                                                                                                                                                                                                                                                                                                                                                                                                                                                                                                                                                       |
|                                 |                                                                                                                                                                                                                                                                                                                                                                                                                                                                                                                                                                         |                         | M                                                                                                                                                                                                                                                               | SD                                                                 |                                                                                                                                                                                                                                                                                                                                                                                                                                           |                                                                                                                                                                                                                                                                                                                                                                                                                                                                                                                                                                                                                                       |
|                                 |                                                                                                                                                                                                                                                                                                                                                                                                                                                                                                                                                                         |                         | M                                                                                                                                                                                                                                                               | SD                                                                 |                                                                                                                                                                                                                                                                                                                                                                                                                                           |                                                                                                                                                                                                                                                                                                                                                                                                                                                                                                                                                                                                                                       |
| APOE4- (n = 239)                | Concussion rate per 10,000 exposures                                                                                                                                                                                                                                                                                                                                                                                                                                                                                                                                    | 6.7                     | 23.3                                                                                                                                                                                                                                                            | Relative risk for concussion rate (APOE4+ vs 4-): RR 1.2 (0.5-2.6) |                                                                                                                                                                                                                                                                                                                                                                                                                                           |                                                                                                                                                                                                                                                                                                                                                                                                                                                                                                                                                                                                                                       |
| APOE4+ (n = 79)                 | Concussion rate per 10,000 exposures                                                                                                                                                                                                                                                                                                                                                                                                                                                                                                                                    | 7.9                     | 24.7                                                                                                                                                                                                                                                            |                                                                    |                                                                                                                                                                                                                                                                                                                                                                                                                                           |                                                                                                                                                                                                                                                                                                                                                                                                                                                                                                                                                                                                                                       |

(continued)



SUPPLEMENTARY TABLE S4. (CONTINUED)

| Author         | Treatment/Comparator                                                                                                                                                                                                                                                                                                                                                                                                                                                                                                                                             | OC                                   | 3 weeks post-TBI                                |                                       | SE         | Comment                                                                                                                                                                                                                                                                                                                                                                                                                                                                                                                              |
|----------------|------------------------------------------------------------------------------------------------------------------------------------------------------------------------------------------------------------------------------------------------------------------------------------------------------------------------------------------------------------------------------------------------------------------------------------------------------------------------------------------------------------------------------------------------------------------|--------------------------------------|-------------------------------------------------|---------------------------------------|------------|--------------------------------------------------------------------------------------------------------------------------------------------------------------------------------------------------------------------------------------------------------------------------------------------------------------------------------------------------------------------------------------------------------------------------------------------------------------------------------------------------------------------------------------|
|                |                                                                                                                                                                                                                                                                                                                                                                                                                                                                                                                                                                  |                                      | Difference in M score (APOE4+ vs APOE4-)        |                                       |            |                                                                                                                                                                                                                                                                                                                                                                                                                                                                                                                                      |
| Lieberman 2002 | APOE4- (n=62) vs APOE4+ (n=18)                                                                                                                                                                                                                                                                                                                                                                                                                                                                                                                                   | Grooved pegboard PASAT 2.8s trial    | -16.3                                           | -3.3                                  | 5.5<br>1.1 | PASAT=paced auditory serial addition test; subject presented with 3 numbers and must state sums of a+b then b+c, e.g. "3, 5 and 9" - correct response "8 and 14". '2.8s' in name refers to speed at which digits are presented. Values presented are adjusted difference in Ms and SE for APOE4+ vs APOE4-. At 3 weeks, p=0.005 for pegboard and p=0.004 for PASAT. Whilst initial performance impaired to a greater extent in APOE4+ patients 3 weeks following TBI, this difference had disappeared by 6 weeks (all p values >0.1) |
| Lichtman 2000  | APOE4- (n=24) vs APOE4+ (n=7)                                                                                                                                                                                                                                                                                                                                                                                                                                                                                                                                    | FIM corrected for coma               | M 121.3                                         | SD 6.37                               |            | Functional Independence Measure (FIM) (after adjustment for coma) lower in APOE4+ subjects p=0.050, i.e. e4 allele predisposes to poorer rehabilitation outcome. This is driven by worse motor outcome - p=0.026 for worse motor FIM in APOE4+, p=0.247 for sensory FIM.                                                                                                                                                                                                                                                             |
| Miller 2010    | Comments<br>No statistically significant association between APOE genotype and either early or delayed post-traumatic seizures (PTS). Only four E4 homozygous patients in cohort, of whom two developed late PTS - authors conclude that 4/4 may be a risk genotype for delayed onset PTS.                                                                                                                                                                                                                                                                       |                                      |                                                 |                                       |            |                                                                                                                                                                                                                                                                                                                                                                                                                                                                                                                                      |
| Müller 2009    | Comments<br>Authors calculated an "impairment index": (number of parameters with score >1.5 SD variation from norm) / (total number of parameters) i.e. impairment index of 0 implies subject has not scored worse than norm on any measure, index of 1 implies worse than norm on every measure. Once adjusted for GCS, CT/MRI findings, S-100B, age - APOE4+ had higher 6 month impairment index than APOE4- (difference 0.08, 95%CI 0.03-0.14, p=0.006), and a smaller reduction in impairment index from baseline to followup (i.e. lesser recovery) p=0.046 |                                      |                                                 |                                       |            |                                                                                                                                                                                                                                                                                                                                                                                                                                                                                                                                      |
| Noé 2010       | PTA cohort (n=67)                                                                                                                                                                                                                                                                                                                                                                                                                                                                                                                                                | Emergence from PTA<br>Persistent PTA | APOE4+ % of cohort<br>25.4% (n=14)<br>25% (n=3) |                                       |            | APOE4 incidence in those who were in PTA but emerged during the study period, and those who did not emerge, did not differ significantly. Amongst those already out of PTA at admission, there was a genotype effect on scores (both at admission and at followup); for the WMI WAIS-III there was a "Time x Genotype" interaction for the degree of improvement in TAVEC (spanish language CVLT) scores - APOE4 performed worse and had improved less at follow-up.                                                                 |
| Rapoport 2008  | TBI vs Controls                                                                                                                                                                                                                                                                                                                                                                                                                                                                                                                                                  | Dementia<br>Mild cog impairment      | 1 year<br>4/49 (8.2%)<br>2/49 (4.1%)            | 2 years<br>1/30 (3.3%)<br>2/30 (6.7%) |            | Chi-squared for effect of TBI on MCI/development of dementia p=0.882<br>Chi-squared for TBIxAPOE on MCI/development of dementia p=0.127<br>i.e. no observed effect of either TBI or APOE4 on development of cognitive difficulties in this cohort                                                                                                                                                                                                                                                                                    |
| Shadli 2011    | Comments<br>No differences between APOE4+ and APOE4- groups on any of AVLT, COWA, WCST, trail making test B. Both groups perform poorly initially but improved significantly and to a statistically similar level between week 6 and month 6 post-injury.                                                                                                                                                                                                                                                                                                        |                                      |                                                 |                                       |            |                                                                                                                                                                                                                                                                                                                                                                                                                                                                                                                                      |

(continued)

|                       |                                                                                                                                                                                                                                                                                                                                                                                                                                                                                 |                                                         |                                                                                                                                                                                                                                                                                                                                                                                                                                                                                                 |                         |                        |                                                                                                                                                                                                                                                    |                                                                                                                                                                                                                                                                                                                                                                                                                                                                                                                                                                                                                                                                                                                                               |  |         |
|-----------------------|---------------------------------------------------------------------------------------------------------------------------------------------------------------------------------------------------------------------------------------------------------------------------------------------------------------------------------------------------------------------------------------------------------------------------------------------------------------------------------|---------------------------------------------------------|-------------------------------------------------------------------------------------------------------------------------------------------------------------------------------------------------------------------------------------------------------------------------------------------------------------------------------------------------------------------------------------------------------------------------------------------------------------------------------------------------|-------------------------|------------------------|----------------------------------------------------------------------------------------------------------------------------------------------------------------------------------------------------------------------------------------------------|-----------------------------------------------------------------------------------------------------------------------------------------------------------------------------------------------------------------------------------------------------------------------------------------------------------------------------------------------------------------------------------------------------------------------------------------------------------------------------------------------------------------------------------------------------------------------------------------------------------------------------------------------------------------------------------------------------------------------------------------------|--|---------|
| Sundström<br>2004     | Treatment/Comparator                                                                                                                                                                                                                                                                                                                                                                                                                                                            | OC                                                      | Pre-injury                                                                                                                                                                                                                                                                                                                                                                                                                                                                                      |                         |                        |                                                                                                                                                                                                                                                    | Post-injury                                                                                                                                                                                                                                                                                                                                                                                                                                                                                                                                                                                                                                                                                                                                   |  | Comment |
|                       | TBI APOE4- (n=23)                                                                                                                                                                                                                                                                                                                                                                                                                                                               | Recall (divided)                                        | 3.96                                                                                                                                                                                                                                                                                                                                                                                                                                                                                            | 0.88                    | 3.78                   | 1.09                                                                                                                                                                                                                                               | Verbal recall of word lists immediately following presentation tested under conditions of focussed attention during encoding, and divided attention during encoding (distractor task consisting of sorting cards according to colour). APOE4+ subjects had a significant drop in performance on the divided attention task following head injury, whereas APOE4- subjects, and matched APOE4+ non-TBI controls did not suffer a decline in performance between the 2 testing points (p<0.05). 10 participants had a pre-post injury drop of >1 SD on 2 or more tests - 6 were APOE4+ (6/11, 54% of that genotype) and 4 APOE- (4/23, 17%) - P<0.05 for association between genotype and significant decline in performance on multiple tests. |  |         |
|                       | TBI APOE4+ (n=11)                                                                                                                                                                                                                                                                                                                                                                                                                                                               | Recall (divided)                                        | 4.45                                                                                                                                                                                                                                                                                                                                                                                                                                                                                            | 1.21                    | 3.64                   | 0.81                                                                                                                                                                                                                                               |                                                                                                                                                                                                                                                                                                                                                                                                                                                                                                                                                                                                                                                                                                                                               |  |         |
| Sundström<br>2007 (1) | Treatment/Comparator                                                                                                                                                                                                                                                                                                                                                                                                                                                            | Outcome                                                 | APOE4+<br>(n=12)                                                                                                                                                                                                                                                                                                                                                                                                                                                                                |                         | APOE4-<br>(n=19)       |                                                                                                                                                                                                                                                    | Comment                                                                                                                                                                                                                                                                                                                                                                                                                                                                                                                                                                                                                                                                                                                                       |  |         |
|                       | mild TBI<br>(n=31)                                                                                                                                                                                                                                                                                                                                                                                                                                                              | Fatigue<br>post-injury                                  | %                                                                                                                                                                                                                                                                                                                                                                                                                                                                                               | n                       | %                      | n                                                                                                                                                                                                                                                  | Total numbers of APOE4+/- subjects not given in paper; calculated from % of whole mTBI group with fatigue post-injury and % with fatigue for each genotype. APOE4+ mTBI subjects more fatigued than APOE4- mTBI subjects post-injury (p<0.05), and more fatigued than APOE4+ controls post-injury (p=0.02). APOE4- mTBI subjects were not more fatigued post-injury than APOE4- controls (32% vs 21%, p=0.52).                                                                                                                                                                                                                                                                                                                                |  |         |
|                       |                                                                                                                                                                                                                                                                                                                                                                                                                                                                                 |                                                         | 58                                                                                                                                                                                                                                                                                                                                                                                                                                                                                              | 7                       | 32                     | 6                                                                                                                                                                                                                                                  |                                                                                                                                                                                                                                                                                                                                                                                                                                                                                                                                                                                                                                                                                                                                               |  |         |
| Sundström<br>2007 (2) | Treatment/Comparator                                                                                                                                                                                                                                                                                                                                                                                                                                                            | OC                                                      | APOE4+                                                                                                                                                                                                                                                                                                                                                                                                                                                                                          |                         | APOE4-                 |                                                                                                                                                                                                                                                    | Comment                                                                                                                                                                                                                                                                                                                                                                                                                                                                                                                                                                                                                                                                                                                                       |  |         |
|                       |                                                                                                                                                                                                                                                                                                                                                                                                                                                                                 |                                                         | number<br>affected (%)                                                                                                                                                                                                                                                                                                                                                                                                                                                                          | N                       | number<br>affected (%) | N                                                                                                                                                                                                                                                  | OR for dementia following head injury, via comparison to non-head injured APOE4- subjects (reference):<br>TBI APOE4+ 5.2 (2.0–14.0) p<0.001<br>TBI APOE4- 0.9 (0.4–1.8) (NS)<br>control APOE4+ 3.0 (1.9–4.7) p<0.001<br>i.e. increased risk of dementia following mTBI only manifests in APOE4+ subjects, by exacerbating their already higher background risk.                                                                                                                                                                                                                                                                                                                                                                               |  |         |
|                       | Dementia<br>(n=181)                                                                                                                                                                                                                                                                                                                                                                                                                                                             | Head injury                                             | 13 (14.9%)                                                                                                                                                                                                                                                                                                                                                                                                                                                                                      | 87                      | 12 (12.8%)             | 94                                                                                                                                                                                                                                                 |                                                                                                                                                                                                                                                                                                                                                                                                                                                                                                                                                                                                                                                                                                                                               |  |         |
|                       |                                                                                                                                                                                                                                                                                                                                                                                                                                                                                 | No head injury                                          | 74 (85.1%)                                                                                                                                                                                                                                                                                                                                                                                                                                                                                      | 87                      | 82 (87.2%)             | 94                                                                                                                                                                                                                                                 |                                                                                                                                                                                                                                                                                                                                                                                                                                                                                                                                                                                                                                                                                                                                               |  |         |
|                       | Controls<br>(n=362)                                                                                                                                                                                                                                                                                                                                                                                                                                                             | Head injury                                             | 10 (10.5%)                                                                                                                                                                                                                                                                                                                                                                                                                                                                                      | 95                      | 36 (13.5%)             | 267                                                                                                                                                                                                                                                |                                                                                                                                                                                                                                                                                                                                                                                                                                                                                                                                                                                                                                                                                                                                               |  |         |
|                       |                                                                                                                                                                                                                                                                                                                                                                                                                                                                                 | No head injury                                          | 85 (89.5%)                                                                                                                                                                                                                                                                                                                                                                                                                                                                                      | 95                      | 231 (86.5%)            | 267                                                                                                                                                                                                                                                |                                                                                                                                                                                                                                                                                                                                                                                                                                                                                                                                                                                                                                                                                                                                               |  |         |
| Teasdale<br>2000      | Comments                                                                                                                                                                                                                                                                                                                                                                                                                                                                        |                                                         |                                                                                                                                                                                                                                                                                                                                                                                                                                                                                                 |                         |                        |                                                                                                                                                                                                                                                    |                                                                                                                                                                                                                                                                                                                                                                                                                                                                                                                                                                                                                                                                                                                                               |  |         |
|                       | Cohort includes CVA and TBI patients admitted to rehab, with no separate raw data for TBI subjects. Authors do report that overall at 1 year follow-up APOE4+ subjects were more disabled (and APOE4- less disabled) relative to pre-admission on measures of cognition, depression, impulsivity, somatization, motivation, isolation and communication, remains significant when analysing purely TBI cases (p<0.025). Overall the groups differed on global scale by 0.87 SD. |                                                         |                                                                                                                                                                                                                                                                                                                                                                                                                                                                                                 |                         |                        |                                                                                                                                                                                                                                                    |                                                                                                                                                                                                                                                                                                                                                                                                                                                                                                                                                                                                                                                                                                                                               |  |         |
| Jiang<br>2007         | Treatment/Comparator                                                                                                                                                                                                                                                                                                                                                                                                                                                            | APOE promoter-491 AA                                    |                                                                                                                                                                                                                                                                                                                                                                                                                                                                                                 | APOE promoter-491 AT/TT |                        | Comments                                                                                                                                                                                                                                           |                                                                                                                                                                                                                                                                                                                                                                                                                                                                                                                                                                                                                                                                                                                                               |  |         |
|                       |                                                                                                                                                                                                                                                                                                                                                                                                                                                                                 | %                                                       |                                                                                                                                                                                                                                                                                                                                                                                                                                                                                                 | %                       |                        | Higher proportion of -491AA deteriorate than AT/TT.<br>OR for clinical deterioration if -491AA genotype (vs AT/TT) - OR 11.681 (1.824–74.49) p=0.009 (after adjustment for injury severity, age, GCS, CT findings, smoking, gender, alcohol, age). |                                                                                                                                                                                                                                                                                                                                                                                                                                                                                                                                                                                                                                                                                                                                               |  |         |
|                       | Clinical deterioration (n=19)                                                                                                                                                                                                                                                                                                                                                                                                                                                   | 84.20%                                                  |                                                                                                                                                                                                                                                                                                                                                                                                                                                                                                 | 15.80%                  |                        |                                                                                                                                                                                                                                                    |                                                                                                                                                                                                                                                                                                                                                                                                                                                                                                                                                                                                                                                                                                                                               |  |         |
|                       | Clinical stabilisation (n=91)                                                                                                                                                                                                                                                                                                                                                                                                                                                   | 67%                                                     |                                                                                                                                                                                                                                                                                                                                                                                                                                                                                                 | 33%                     |                        |                                                                                                                                                                                                                                                    |                                                                                                                                                                                                                                                                                                                                                                                                                                                                                                                                                                                                                                                                                                                                               |  |         |
| Eramudugolla<br>2014  | APOE4 status x History<br>of TBI x Age                                                                                                                                                                                                                                                                                                                                                                                                                                          | Outcome                                                 | Comments                                                                                                                                                                                                                                                                                                                                                                                                                                                                                        |                         |                        |                                                                                                                                                                                                                                                    |                                                                                                                                                                                                                                                                                                                                                                                                                                                                                                                                                                                                                                                                                                                                               |  |         |
|                       |                                                                                                                                                                                                                                                                                                                                                                                                                                                                                 | CVLT, reaction time,<br>Wechsler working<br>memory test | In the youngest cohort, APOE4 carriers who reported a TBI erformed worse than APOE3 homozygotes on measures of episodic memory - on subgroup analysis this was driven by moderate/severe TBI subjects. On average APOE4 carriers whose first TBI was as a child performed better on verbal ability than APOE3 homozygotes. In 40s cohort only those with childhood TBI had different performance based on genotype (APOE4 carriers slower reaction times). No genotype effect in oldest cohort. |                         |                        |                                                                                                                                                                                                                                                    |                                                                                                                                                                                                                                                                                                                                                                                                                                                                                                                                                                                                                                                                                                                                               |  |         |

(continued)

SUPPLEMENTARY TABLE S4. (CONTINUED)

|              |                            |                                                              |                                                                                                                                                                                                           |
|--------------|----------------------------|--------------------------------------------------------------|-----------------------------------------------------------------------------------------------------------------------------------------------------------------------------------------------------------|
| Banks 2015   | APOE4 status               | Thalamic & hippocampal volume, verbal memory scores          | Conference abstract. Combat sports participants. Worse performance on verbal memory scores amongst APOE4+ participants but no differences in thalamic or hippocampal volume on imaging between genotypes. |
| Merritt 016  | APOE4 status               | Post Concussion Symptom Scale                                | APOE4+ college athletes with had increased post-concussive symptom burden by PCSS (on average tested 7.8 days post injury).                                                                               |
| Padgett 2016 | Three APOE genotype groups | COWAT, TMT, WAIS-III                                         | No difference in measures of working memory between any of the three genotypes studied (3/4 & 4/4 vs 3/3 vs 2/3 & 2/2)                                                                                    |
| Mejia 2016   | APOE genotype              | Multilinear regression for factors associated with lower DRS | Age and APOE3 containing genotypes (2/3, 3/3, 3/4) associated with better outcome (lower DRS) at $p < 0.05$                                                                                               |

SUPPLEMENTARY TABLE S5. CHARACTERISTICS OF STUDIES OF APOE GENE (MEASURING ALL OTHER OUTCOMES)

| Study ID          | Setting (country) | Design       | Number (n=)                             | Age (m, SD or range)                                                                                 | Gender (M, %) (n, %)                   | Severity                                              |                                                                               |                                       |                                                                            | OC                                                                                  |
|-------------------|-------------------|--------------|-----------------------------------------|------------------------------------------------------------------------------------------------------|----------------------------------------|-------------------------------------------------------|-------------------------------------------------------------------------------|---------------------------------------|----------------------------------------------------------------------------|-------------------------------------------------------------------------------------|
|                   |                   |              |                                         |                                                                                                      |                                        | GCS (m±SD)                                            | GCS 3–8 (n, %)                                                                | GCS 9–12 (n, %)                       | GCS 13–15 (n, %)                                                           |                                                                                     |
| Anderson 2009     | Hosp. (USA)       | Retr. cohort | APOE4-: 36<br>APOE4+: 15<br>Total: 120  | 33.9±11.8<br>38.2±10.1<br>28                                                                         | 32 (89)<br>13 (87)<br>NR               | NR<br>NR<br>NR                                        | 53% uncons. >24h, 28% 1–24h, 19% <24h<br>40% uncons. >24h, 53% 1–24h, 7% <24h | NR<br>NR<br>NR                        | SRT<br>Hippocampal & thalamic volume on MRI, verbal memory testing<br>CVLT |                                                                                     |
| Banks 2015        | Com. (USA)        | Retr. Cohort |                                         |                                                                                                      |                                        |                                                       |                                                                               |                                       |                                                                            |                                                                                     |
| Crawford 2002     | Hosp. (USA)       | Pros. cohort | APOE4-: 80<br>APOE4+: 30                | 33.6±14.2<br>32.3±11.6                                                                               | (100)<br>(100)                         | 8±4.38<br>8.17±4.24                                   | NR<br>NR                                                                      | NR<br>NR                              | NR<br>NR                                                                   |                                                                                     |
| Eramudugolla 2014 | Com. (Australia)  | Retr. cohort | 20s: 2077<br>40s: 2124<br>60s: 2132     | 22.61±1.51<br>42.62±1.49<br>62.51±1.51                                                               | 969 (46.7)<br>979 (46.1)<br>1076(50.5) | Mild: 176 (8.5%)<br>Mild: 128 (6%)<br>Mild: 66 (3.1%) | Mod/sev: 31 (1.5%)<br>Mod/sev: 55 (2.6%)<br>Mod/sev: 33 (1.5%)                |                                       |                                                                            |                                                                                     |
| Han 2007          | Hosp. (USA)       | Pros. cohort | APOE4-: 62<br>APOE4+: 16                | 25.3±5.8<br>22.6±3.8                                                                                 | 59 (95.2)<br>13 (81.3)                 | NR<br>NR                                              | NR<br>NR                                                                      | NR<br>NR                              | 43 (69.4)<br>8 (50)                                                        |                                                                                     |
| Han 2009          | Hosp., (USA)      | Pros. cohort | APOE4-: 30<br>APOE4+: 16                | 25.2±6.1<br>22.6±3.8                                                                                 | 29 (96.7)<br>13 (81.3)                 | NR<br>NR                                              | NR<br>NR                                                                      | NR<br>NR                              | 17 (56.7)<br>8 (50)                                                        | Change in job                                                                       |
| Isoniemi 2006     | Hosp. (Finland)   | Retr. cohort | APOE2+: 10<br>APOE3/3: 32<br>APOE4+: 19 | 60.6±12.2<br>59.4±8.9<br>61.4±10.6                                                                   | 5 (50)<br>23 (72)<br>14 (74)           | NR<br>NR<br>NR                                        | 7 (70)<br>16 (50)<br>9 (47)                                                   | 1 (10)<br>9 (28)<br>4 (21)            | 2 (20)<br>7 (22)<br>6 (32)                                                 | MDB                                                                                 |
| Jiang 2006        | Hosp. (China)     | Pros. cohort | Clin. det: 19<br>Clin. Stab: 91         | NR<br>NR                                                                                             | 15 (78.9)<br>65 (71.4)                 | NR<br>NR                                              | NR<br>NR                                                                      | GCS >8: 28 (30.8)<br>GCS >8:63 (69.2) |                                                                            | APOE4 incidence between groups<br>Conc'n rate*                                      |
| Kristman 2008     | Com. (Canada)     | Pros. cohort | APOE4-: 239<br>APOE4+: 79               | 20.4±2.3<br>20.9±2.8                                                                                 | 127 (53.1)<br>37 (46.8)                | NR<br>NR                                              | NR<br>NR                                                                      | NR<br>NR                              |                                                                            |                                                                                     |
| Lee 2017          | Hosp. (Taiwan)    | Pros. cohort | APOE4-: 154<br>APOE4+: 35               | 40.1±15.15<br>42.2±14.76                                                                             | 60 (39)<br>16 (45.7)                   | NR<br>NR                                              | NR<br>NR                                                                      | NR<br>NR                              | 154<br>35                                                                  | Sleep quality (PSQI)                                                                |
| Liberman 2002     | Hosp. (USA)       | Pros. cohort | APOE4-: 79                              | 33.9% <30, 32.3% 30–49,<br>33.9% 50+<br>22.2% <30, 50% 30–49,<br>27.8% 50+<br>34.3±18.1<br>39.8±15.3 | (56.6)                                 | NR<br>NR<br>NR                                        | NR<br>NR<br>NR                                                                | NR<br>NR<br>NR                        | (91.9)<br>(83.3)                                                           | PASAT, GPT                                                                          |
| Lichtman 2000     | Hosp. (USA)       | Pros. cohort | APOE4-: 24<br>APOE4+: 7<br>Total: 170   | NR<br>NR                                                                                             | 17 (70.8)<br>5 (71.4)<br>134 (78.8)    | NR<br>NR<br>NR                                        | Coma length (days±SD)=36.4±58.3<br>Coma length (days±SD)=7.5±8.5              |                                       |                                                                            | FIM (6)                                                                             |
| Mejia 2016        | Hosp. (USA)       | Pros. cohort | APOE4-: 27<br>APOE4+: 15                | 20±1.59<br>19.93±1.39                                                                                | 23 (85.2)<br>12 (80)                   | NR<br>NR                                              | NR<br>NR                                                                      | NR<br>NR                              | 0                                                                          | DRS at 3 & 6 months<br>Post-Concussion Symptom Scale (average 7.8 days post injury) |
| Merritt 2016      | Com. (USA)        | Retr. Cohort |                                         |                                                                                                      |                                        |                                                       |                                                                               |                                       |                                                                            |                                                                                     |
| Miller 2010       | ITU (USA)         | Pros. cohort | APOE4-: 243<br>APOE4+: 79               | NR<br>NR                                                                                             | (77)<br>NR                             | NR<br>NR                                              | 100% GCS 3–8, median GCS 6                                                    |                                       |                                                                            | Seizures                                                                            |
| Müller 2009       | Hosp. (Norway)    | Pros. cohort | Whole cohort: 59<br>Pers. PTA: 12       | 35.1 (18 – 74)<br>39.9±18.2                                                                          | 47 (79.7)<br>48 (71.6)                 | NR<br>NR                                              | NR<br>NR                                                                      | NR<br>NR                              | NR<br>NR                                                                   | Impairment index<br>APOE4 incidence betw. gps: WAIS, TAVEC**                        |
| Noé 2010          | Rehab. (Spain)    | Pros. cohort | Emer. PTA: 55<br>Not in PTL: 59         | 29.2±14.5<br>29.5±10.5                                                                               | 42 (71.2)                              | NR<br>NR                                              | NR<br>NR                                                                      | NR<br>NR                              | NR<br>NR                                                                   |                                                                                     |

(continued)

SUPPLEMENTARY TABLE S5. (CONTINUED)

| Study ID           | Setting (country) | Design             | Number (n =)                             | Age (m, SD or range)                      | Gender (M, %)                | Severity               |                                                 |                                       |                                        | OC                                                                                              |
|--------------------|-------------------|--------------------|------------------------------------------|-------------------------------------------|------------------------------|------------------------|-------------------------------------------------|---------------------------------------|----------------------------------------|-------------------------------------------------------------------------------------------------|
|                    |                   |                    |                                          |                                           |                              | GCS (m±SD)             | GCS 3–8 (n, %)                                  | GCS 9–12 (n, %)                       | GCS 13–15 (n, %)                       |                                                                                                 |
| Padgett 2016       | Com. (Australia)  | Pros. Cohort       | APOE4+: 37<br>APOE3/E3: 92<br>APOE2+: 13 | 40.62±17.47<br>39.89±16.89<br>41.37±17.69 | 19 (51)<br>49 (53)<br>9 (69) | NR<br>NR<br>NR         | 1 (4.8)<br>4 (5.7)<br>0                         | 1 (4.8)<br>3 (2.8)<br>0               | 34 (70.27)<br>82 (86.8)<br>12 (92.3)   | COWAT, TMT, WAIS-III (testing on remission from PTA). All genotypes missing some severity data. |
| Rapport 2008       | Hosp. (Canada)    | Pros. case-control | TBI n = 69<br>Controls n = 78            | 67±7.9                                    | (47.8)<br>(48.1)             | NR                     | 0                                               | 32 (46.4)                             | 37 (53.6)                              | Dementia or MCI (1, 2 y)                                                                        |
| Shadli 2011        | Hosp. (Malaysia)  | Pros. cohort       | APOE4+: 13<br>APOE4+6                    | 68.0±8.5<br>26.1±6.8                      | NR                           | 13.3±2.06<br>13.0±2.00 | NR                                              | NR                                    | NR                                     | WCST, TMT, RAVLT, COWAT                                                                         |
| Sundström 2004     | Com. (Sweden)     | Retr. cohort       | APOE4+: 23<br>APOE4+: 11                 | 25.0±8.63<br>55.9±12.6<br>58.2±16.3       | 11 (47.8)<br>6 (54.5)        | NR<br>NR               | Single mTBI: 19 (82.6)<br>Single mTBI: 9 (81.8) | NR                                    | >1 mTBI: 4 (17.4)<br>>1 mTBI: 2 (18.2) | Word recall                                                                                     |
| Sundström 2007 (1) | Com. (Sweden)     | Retr. cohort       | TBI: 31                                  | 55.2±13.6                                 | 18 (58.1)                    | NR                     | NA                                              | NA                                    | (100) mTBI                             | Fatigue                                                                                         |
| Sundström 2007 (2) | Com. (Sweden)     | Retr. cohort       | Dementia: 181                            | 73.2±7.8                                  | 59 (32.6)                    | NR                     | Single mTBI: 25 (13.8)                          | >1 mTBI: 4 (2.21%)                    | >1 mTBI: 11 (3.04)                     | Incidence of dementia following mild TBI                                                        |
| Teasdale TW 2000   | Rehab. (Denm.)    | Pros. cohort       | Controls: 362<br>APOE4+: 29              | 72.6±7.5<br>31.4±10                       | 118 (32.6)<br>19 (65)        | NR<br>TBI: 14 (48)     | NR<br>NR                                        | NR<br>NR                              | NR<br>NR                               | EBIQ (1 y)                                                                                      |
| Yue 2017           | Hosp. (USA)       | Pros. cohort       | APOE4+: 10<br>APOE4+: 79<br>APOE4+: 35   | 38.6±12.5<br>39.7±16.5<br>49.6±13.6       | 6 (60)<br>49 (62)<br>30 (38) | NR<br>TBI: 4 (40)      | 16 (20%)<br>7 (20%)                             | GCS 13–14, 63 (80%)<br>GCS 15         | GCS 15                                 | CVLT-II                                                                                         |
| Jiang 2007         | Hosp. (China)     | Retr. cohort       | Deteriorated 19                          | NR                                        | 15 (78.9)                    | NR                     | GCS <8: 10 (52.6)<br>GCS >8: 28 (30.8)          | GCS <8: 9 (47.4)<br>GCS >8: 63 (69.2) | NR                                     | Incidence of early clinical deterioration                                                       |
| Lendon 2003        | Hosp. (UK)        | Retr. cohort       | Stabilised 91<br>TBI: 90                 | 38 (<1–82)                                | 65 (71.4)                    | NR                     | NR                                              | NR                                    | NR                                     | GOS (6)                                                                                         |

COWAT, Controlled Oral Word Association Test, CVLT, California Verbal Learning Test, betw., between, clin., clinical, com., community, conc'n, concussion, Denm. = Denmark, det., deterioration, EBIQ, European Brain Injury Questionnaire, Emer = emerging from, FIM = Functional Independence Measure, GCS = Glasgow Coma Scale, gcs+, groups, GPT, Grooved Pegboard Test, hosp. = hospital, ITU = Intensive Therapy Unit, m = mean, M, male, MDB, Mild Deterioration Battery, mTBI, mild traumatic brain injury, OC, outcome, NA, not applicable, NR, not reported, PASAT, Paced Auditory Serial Addition Test, Pers., persistent, PSQI = Pittsburgh Sleep Quality Index, PTA, post-traumatic amnesia, prev. = previous, Pros., prospective, Rehab., rehabilitation, RAVLT = Rey Auditory Verbal Learning Test, retr., retrospective, SD, standard deviation, SRT, Selective Reminding Test, stab., stabilization, TAVEC, Test de Aprendizaje Verbal Complutense (Spanish CVLT), TBI, Traumatic brain injury, TMT, Trail making test, WAIS, Wechsler Adult Intelligence Scale, WCST, Wisconsin Card Sorting Test, WM, Wechsler Working Memory testing. \*Measured as concussion rate per 10,000 sports exposures over 4 years. \*\*measured after emergence from post-traumatic amnesia
